# Supplementary material for: Nuclear DNA Methylation and Chromatin Condensation Phenotypes Are Distinct Between Normally Proliferating/Aging, Rapidly Growing/Immortal, and Senescent Cells
Source: PubMed Central journal article supplement (PMC3717309; doi:10.18632/oncotarget.942), 2013-03-26
Supplement: oncotarget-04-474-s001.pdf [file oncotarget-04-474-s001.pdf]

## Nuclear DNA Methylation and Chromatin Condensation Phenotypes Are Distinct Between Normally Proliferating/Aging, Rapidly Growing/Immortal, and Senescent Cells- Ho Oh et al

### 1. Cell cycle synchronization

Cell cycle synchronization results (as analyzed by ModFit LT) are shown in Table S1.1. To maintain consistency,  $G_2/G_1$  ratio was maintained at 1.9–2 in all populations. In all conditions, a supermajority (>75%) of cells was found to be in the desired phase. These results suggest that HDF and DU145 cells were correctly synchronized as expected.

| Population type | % in $G_0/G_1$ phase | % in S phase | % in $G_2/M$ phase |
|-----------------|----------------------|--------------|--------------------|
| HDF $G_0/G_1$   | 79.9%                | 20.1%        | 0.0%               |
| HDF $G_2$       | 0.0%                 | 13.8%        | 86.2%              |
| DU145 $G_0/G_1$ | 76.0%                | 18.0%        | 6.0%               |
| DU145 $G_2$     | 0.0%                 | 20.1%        | 79.9%              |

Table S1.1: Cell cycle synchronization results.

HDF and DU145 cells were synchronized to  $G_0/G_1$  phase by serum starvation and  $G_2$  phase by double thymidine block. After synchronization, cells were labeled with propidium iodide and subjected to flow cytometry. The FACS results were analyzed with ModFit LT.

### 2. Cell viability

The viability of synchronized population was tested using FITC Annexin V Apoptosis Detection Kit I (Table S1.2). Viable and not apoptotic cells (FITC<sup>-</sup>, PI<sup>-</sup>) represented ~ 90% of  $G_0/G_1$  synchronized population and ~ 96% of  $G_2$  synchronized population for both HDF and DU145 cells. As expected from the serum starvation treatment used in  $G_0/G_1$  synchronization, the proportion of likely necrotic cells (FITC<sup>+</sup>, PI<sup>+</sup>) were greater in  $G_0/G_1$  population (4.9% HDF,

5.6% DU145) than G<sub>2</sub> population (1.9% HDF, 1.6% DU145). However, the proportion of dead cells is minimal and should not affect the subsequent analysis.

| <b>Population type</b>                   | <b>% viable and not apoptotic (FITC<sup>-</sup>, PI)</b> | <b>% likely apoptotic (FITC<sup>+</sup> PI)</b> | <b>% likely necrotic (FITC<sup>+</sup>, PI<sup>+</sup>)</b> | <b>% other (FITC<sup>-</sup>, PI<sup>+</sup>)</b> |
|------------------------------------------|----------------------------------------------------------|-------------------------------------------------|-------------------------------------------------------------|---------------------------------------------------|
| <b>HDF G<sub>0</sub>/G<sub>1</sub></b>   | 90.3%                                                    | 2.8%                                            | 4.9%                                                        | 2.0%                                              |
| <b>HDF G<sub>2</sub></b>                 | 96.6%                                                    | 0.8%                                            | 1.9%                                                        | 0.7%                                              |
| <b>DU145 G<sub>0</sub>/G<sub>1</sub></b> | 90.4%                                                    | 3.8%                                            | 5.6%                                                        | 0.2%                                              |
| <b>DU145 G<sub>2</sub></b>               | 96.4%                                                    | 1.9%                                            | 1.6%                                                        | 0.1%                                              |

Table S1.2: Cell viability results.

HDF and DU145 cells synchronized to G<sub>0</sub>/G<sub>1</sub> and G<sub>2</sub> phases were tested for viability using FITC Annexin V Apoptosis Detection Kit I. The viable and not apoptotic population (FITC Annexin V and PI negative) was around 90% in G<sub>0</sub>/G<sub>1</sub> synchronized populations and around 96% in G<sub>2</sub> synchronized populations.

## Supplementary File 2

| Cell Type - Passage # | Doubling Time (days) | ROI Volume mean (pixels) | ROI Volume st_dev (pixels) | raw DAPI intensity mean | raw DAPI intensity st_dev | raw MeC intensity mean | raw MeC intensity st_dev | LID% mean | LID% st_dev | LIM% mean | LIM% st_dev | cond mean | cond st_dev | meth mean | meth st_dev | assoc mean | assoc st_dev |
|-----------------------|----------------------|--------------------------|----------------------------|-------------------------|---------------------------|------------------------|--------------------------|-----------|-------------|-----------|-------------|-----------|-------------|-----------|-------------|------------|--------------|
| HPEpiC-P1             | 1.42                 | 152317                   | 63117                      | 1685                    | 466                       | 1142                   | 389                      | 46.09%    | 19.04%      | 47.88%    | 19.53%      | 0.4675    | 0.1102      | 0.4649    | 0.1191      | 0.7494     | 0.0986       |
| HPEpiC-P1             | 1.47                 | 150494                   | 60697                      | 1657                    | 456                       | 1149                   | 379                      | 47.96%    | 18.61%      | 46.73%    | 20.03%      | 0.4628    | 0.1039      | 0.4746    | 0.1215      | 0.7547     | 0.0936       |
| HPEpiC-P1             | 1.44                 | 152427                   | 59370                      | 1665                    | 463                       | 1129                   | 398                      | 46.36%    | 19.18%      | 47.68%    | 20.14%      | 0.4647    | 0.1040      | 0.4728    | 0.1208      | 0.7576     | 0.0988       |
| HPEpiC-P1             | 1.52                 | 156999                   | 65622                      | 1704                    | 463                       | 1136                   | 382                      | 45.18%    | 19.50%      | 48.00%    | 19.28%      | 0.4799    | 0.1045      | 0.4708    | 0.1171      | 0.7514     | 0.0917       |
| HPEpiC-P5             | 1.90                 | 204635                   | 55474                      | 1511                    | 324                       | 1318                   | 366                      | 56.69%    | 16.78%      | 50.35%    | 14.15%      | 0.4365    | 0.0785      | 0.4856    | 0.0908      | 0.7990     | 0.0921       |
| HPEpiC-P5             | 1.92                 | 202671                   | 53126                      | 1544                    | 318                       | 1300                   | 363                      | 55.83%    | 16.75%      | 51.08%    | 14.15%      | 0.4435    | 0.0802      | 0.4695    | 0.0906      | 0.7953     | 0.0905       |
| HPEpiC-P5             | 2.11                 | 201096                   | 54510                      | 1516                    | 315                       | 1311                   | 369                      | 56.39%    | 16.60%      | 51.59%    | 14.34%      | 0.4357    | 0.0810      | 0.4653    | 0.0998      | 0.8021     | 0.0893       |
| HPEpiC-P10            | 8.75                 | 197715                   | 62816                      | 1535                    | 377                       | 793                    | 301                      | 71.68%    | 16.42%      | 70.36%    | 13.18%      | 0.3874    | 0.0911      | 0.2634    | 0.0786      | 0.7802     | 0.0639       |
| HPEpiC-P10            | 11.32                | 192488                   | 63677                      | 1538                    | 385                       | 795                    | 292                      | 71.37%    | 16.69%      | 70.43%    | 13.22%      | 0.3887    | 0.0945      | 0.2609    | 0.0767      | 0.7749     | 0.0664       |
| HPEpiC-P10            | 9.91                 | 193032                   | 63230                      | 1447                    | 401                       | 766                    | 355                      | 75.01%    | 16.68%      | 72.05%    | 15.06%      | 0.3537    | 0.1036      | 0.2521    | 0.0866      | 0.8009     | 0.0809       |
| HPEpiC-P10            | 11.49                | 189228                   | 58003                      | 1367                    | 404                       | 665                    | 310                      | 78.05%    | 16.20%      | 76.69%    | 13.72%      | 0.3240    | 0.1010      | 0.2147    | 0.0813      | 0.8279     | 0.0828       |
| HPEpiC-P11            | 10.00                | 181943                   | 91092                      | 1316                    | 310                       | 603                    | 162                      | 66.43%    | 19.41%      | 70.60%    | 13.98%      | 0.3183    | 0.0916      | 0.2106    | 0.0895      | 0.7500     | 0.0710       |
| HPEpiC-P12            | 100.00               | 224884                   | 92238                      | 1245                    | 360                       | 393                    | 221                      | 57.93%    | 17.24%      | 61.46%    | 16.63%      | 0.2917    | 0.0930      | 0.1158    | 0.0828      | 0.8121     | 0.0988       |
| HPEpiC-P14            | infinity             | 213894                   | 87271                      | 939                     | 386                       | 332                    | 291                      | 84.55%    | 11.69%      | 87.37%    | 10.07%      | 0.2336    | 0.0843      | 0.1102    | 0.0499      | 0.8853     | 0.0987       |
| HDF-P1                | 2.62                 | 169705                   | 40521                      | 1732                    | 336                       | 1512                   | 525                      | 44.07%    | 16.00%      | 47.48%    | 16.99%      | 0.5573    | 0.1174      | 0.5351    | 0.0919      | 0.7781     | 0.1121       |
| HDF-P5                | 2.24                 | 157468                   | 45301                      | 1698                    | 349                       | 1346                   | 282                      | 48.49%    | 16.18%      | 50.65%    | 17.82%      | 0.5255    | 0.1210      | 0.5161    | 0.1208      | 0.7289     | 0.1172       |
| HDF-P10               | 2.91                 | 148899                   | 37665                      | 1650                    | 459                       | 1337                   | 510                      | 52.40%    | 12.51%      | 52.01%    | 9.03%       | 0.5171    | 0.1276      | 0.5228    | 0.1179      | 0.7898     | 0.1022       |
| HDF-P10               | 2.82                 | 151080                   | 34563                      | 1675                    | 522                       | 1353                   | 566                      | 50.98%    | 12.28%      | 51.51%    | 10.49%      | 0.5300    | 0.1251      | 0.5197    | 0.1279      | 0.7821     | 0.0969       |
| HDF-P10               | 2.93                 | 154283                   | 39537                      | 1668                    | 502                       | 1459                   | 578                      | 51.92%    | 14.07%      | 51.74%    | 10.10%      | 0.5206    | 0.1294      | 0.5301    | 0.1237      | 0.7886     | 0.1050       |
| HDF-P15               | 3.28                 | 149423                   | 40485                      | 1793                    | 285                       | 1487                   | 628                      | 44.99%    | 16.60%      | 40.76%    | 23.39%      | 0.4993    | 0.0553      | 0.5450    | 0.1313      | 0.7163     | 0.1058       |

**Supplementary File 2**

|         |      |        |       |      |     |      |     |        |        |        |        |        |        |        |        |        |        |
|---------|------|--------|-------|------|-----|------|-----|--------|--------|--------|--------|--------|--------|--------|--------|--------|--------|
| HDF-P15 | 3.07 | 147446 | 42388 | 1807 | 300 | 1567 | 646 | 44.24% | 17.08% | 38.64% | 23.84% | 0.5021 | 0.0577 | 0.5631 | 0.1354 | 0.7124 | 0.1107 |
| HDF-P15 | 2.97 | 155977 | 42028 | 1791 | 360 | 1400 | 291 | 44.40% | 20.97% | 43.07% | 15.11% | 0.4831 | 0.0716 | 0.5243 | 0.0699 | 0.7131 | 0.0712 |
| HDF-P15 | 3.10 | 152995 | 39078 | 1791 | 367 | 1378 | 288 | 44.36% | 20.37% | 44.45% | 14.71% | 0.4778 | 0.0752 | 0.5228 | 0.0700 | 0.7148 | 0.0749 |
| HDF-P15 | 3.62 | 155435 | 41477 | 1799 | 345 | 1388 | 285 | 44.80% | 19.82% | 43.39% | 15.03% | 0.4854 | 0.0764 | 0.5219 | 0.0716 | 0.7131 | 0.0751 |
| HDF-P15 | 3.26 | 156313 | 41261 | 1808 | 362 | 1404 | 275 | 43.79% | 20.06% | 42.55% | 14.48% | 0.4839 | 0.0774 | 0.5233 | 0.0702 | 0.7133 | 0.0718 |
| HDF-P15 | 3.19 | 152988 | 38882 | 1801 | 354 | 1380 | 281 | 45.12% | 20.34% | 43.68% | 15.35% | 0.4917 | 0.0803 | 0.5214 | 0.0727 | 0.7121 | 0.0747 |
| HDF-P20 | 2.82 | 162922 | 38551 | 1512 | 430 | 1305 | 362 | 56.23% | 16.15% | 50.07% | 19.97% | 0.4692 | 0.0870 | 0.4212 | 0.0640 | 0.7402 | 0.1108 |
| HDF-P20 | 2.90 | 164423 | 38855 | 1509 | 411 | 1300 | 352 | 56.36% | 16.33% | 50.38% | 20.11% | 0.4634 | 0.0925 | 0.4146 | 0.0584 | 0.7456 | 0.1098 |
| HDF-P25 | 3.23 | 198042 | 42494 | 1654 | 300 | 986  | 236 | 56.98% | 14.66% | 55.90% | 13.13% | 0.4486 | 0.0688 | 0.3616 | 0.0797 | 0.7699 | 0.0613 |
| HDF-P25 | 3.14 | 201588 | 42233 | 1673 | 315 | 972  | 223 | 55.79% | 14.53% | 56.64% | 12.50% | 0.4529 | 0.0723 | 0.3578 | 0.0774 | 0.7761 | 0.0638 |
| HDF-P25 | 3.42 | 194620 | 41142 | 1689 | 299 | 1009 | 223 | 54.93% | 13.66% | 54.54% | 12.31% | 0.4595 | 0.0685 | 0.3752 | 0.0759 | 0.7719 | 0.0612 |
| HDF-P30 | 3.82 | 179793 | 51562 | 1586 | 338 | 890  | 378 | 66.65% | 13.59% | 70.57% | 14.30% | 0.3760 | 0.1033 | 0.2451 | 0.0816 | 0.7879 | 0.0606 |
| HDF-P30 | 4.41 | 184842 | 56571 | 1576 | 337 | 884  | 367 | 66.61% | 14.38% | 69.79% | 12.94% | 0.3762 | 0.0993 | 0.2470 | 0.0834 | 0.7862 | 0.0624 |
| HDF-P30 | 3.42 | 178081 | 51670 | 1584 | 326 | 895  | 349 | 66.37% | 13.90% | 69.63% | 12.53% | 0.3666 | 0.0959 | 0.2468 | 0.0761 | 0.7854 | 0.0590 |
| HDF-P30 | 3.73 | 181461 | 55236 | 1594 | 325 | 911  | 368 | 65.97% | 14.76% | 68.82% | 12.22% | 0.3837 | 0.1019 | 0.2543 | 0.0763 | 0.7836 | 0.0616 |
| HDF-P35 | 4.45 | 215455 | 51384 | 1603 | 443 | 774  | 397 | 71.09% | 18.21% | 73.87% | 15.83% | 0.3856 | 0.0990 | 0.1919 | 0.0720 | 0.7764 | 0.1154 |
| HDF-P35 | 4.01 | 213504 | 49725 | 1631 | 439 | 814  | 460 | 70.00% | 17.82% | 73.23% | 17.02% | 0.3962 | 0.0950 | 0.1961 | 0.0729 | 0.7687 | 0.1187 |
| HDF-P35 | 4.18 | 212233 | 52528 | 1640 | 448 | 768  | 371 | 69.31% | 18.51% | 74.55% | 14.86% | 0.3994 | 0.0987 | 0.1835 | 0.0654 | 0.7670 | 0.1166 |
| HDF-P38 | 4.61 | 223879 | 91231 | 1388 | 301 | 643  | 205 | 69.47% | 15.11% | 79.99% | 10.05% | 0.3674 | 0.0757 | 0.1471 | 0.0594 | 0.7689 | 0.0681 |
| HDF-P38 | 6.05 | 226008 | 89222 | 1399 | 315 | 647  | 209 | 68.88% | 15.52% | 80.15% | 10.46% | 0.3725 | 0.0796 | 0.1487 | 0.0624 | 0.7657 | 0.0701 |
| HDF-P38 | 4.86 | 228775 | 90931 | 1370 | 316 | 650  | 230 | 70.57% | 15.73% | 80.03% | 11.08% | 0.3612 | 0.0802 | 0.1472 | 0.0648 | 0.7690 | 0.0750 |
| HDF-P38 | 6.08 | 220862 | 89690 | 1390 | 322 | 629  | 217 | 69.44% | 15.95% | 81.03% | 10.18% | 0.3679 | 0.0815 | 0.1398 | 0.0607 | 0.7672 | 0.0756 |

**Supplementary File 2**

|         |          |        |       |      |     |     |     |        |        |        |        |        |        |        |        |        |        |
|---------|----------|--------|-------|------|-----|-----|-----|--------|--------|--------|--------|--------|--------|--------|--------|--------|--------|
| HDF-P43 | 10.14    | 247705 | 87399 | 1191 | 251 | 577 | 284 | 80.77% | 7.79%  | 81.12% | 11.74% | 0.2594 | 0.0634 | 0.1329 | 0.0586 | 0.7986 | 0.0801 |
| HDF-SIS | infinity | 174841 | 54741 | 1320 | 399 | 335 | 175 | 73.96% | 18.17% | 87.05% | 10.79% | 0.3231 | 0.0970 | 0.1041 | 0.0622 | 0.7874 | 0.0911 |
| HDF-SIS | infinity | 176861 | 54403 | 1329 | 403 | 336 | 170 | 73.04% | 18.09% | 86.98% | 10.62% | 0.3264 | 0.0993 | 0.1049 | 0.0610 | 0.7843 | 0.0899 |

### **Supplementary File 3**

For both HDF and DU145 cells, samples treated with 200  $\mu\text{M}$   $\text{H}_2\text{O}_2$  reached premature senescence, while majority of cells treated with 500  $\mu\text{M}$   $\text{H}_2\text{O}_2$  died after seven days of culture (Tables S3.1 and S3.2). For the control, cell counts at day 7 cannot be accurately reported, as the 6-well culture plate used became completely confluent.

Table S3.1: Cell counts of oxidant-induced premature senescent HDF cells.

| Days after Treatment | Control (0 $\mu\text{M}$ ) | 200 $\mu\text{M}$ | 500 $\mu\text{M}$ |
|----------------------|----------------------------|-------------------|-------------------|
| -1                   | 400,000                    | 400,000           | 400,000           |
| 0                    | 653,000                    | 336,000           | 303,000           |
| 1                    | 1.031,000                  | 352,000           | 268,000           |
| 7                    | completely confluent       | 489,000           | 187,000           |

Table S3.2: Cell counts of oxidant-induced premature senescent DU145 cells.

| Days after Treatment | Control (0 $\mu\text{M}$ ) | 200 $\mu\text{M}$ | 500 $\mu\text{M}$ |
|----------------------|----------------------------|-------------------|-------------------|
| -1                   | 400,000                    | 400,000           | 400,000           |
| 0                    | 676,000                    | 393,000           | 276,000           |
| 1                    | 1,151,000                  | 395,000           | 249,000           |
| 7                    | completely confluent       | 421,000           | 123,000           |

### **Supplementary File 4**

#### **1. Resolution of confocal microscopy**

The resolution of confocal microscopy is primarily dependent upon the wavelength ( $\lambda$ ) of the light used and the numerical aperture (NA). For the purposes of this research, DAPI and Alexa

488 fluorophore were used. As previously mentioned, DAPI was excited at 405 nm, while MeC-conjugated Alexa 488 fluorophore was excited at 488 nm. These values were used as  $\lambda$  in the following calculations. For lateral resolution (in  $x, y$  directions), the Rayleigh criterion states that two points are resolved when the first minimum of one Airy disk is aligned with the central maximum of the second Airy disk. According to this definition, the lateral resolution ( $r_{lateral}$ ) is defined as:

$$r_{lateral} = \frac{1.22\lambda}{2(\eta \sin \alpha)} = \frac{1.22\lambda}{2NA} = \frac{0.61\lambda}{NA}$$

where  $\eta$  is the refractive index of medium between the specimen and the objective lens and  $\alpha$  is the semi-aperture angle of the objective. If the excitation and emission wavelengths are close to each other, the Airy disk size for confocal microscope is the square of the wide-field (“regular”) microscope Airy disk, and thus the lateral intensity point spread function (PSF) is reduced by about 30 percent. Thus, the lateral resolution in the confocal mode can be approximated as:

$$r_{lateral} = \frac{0.4\lambda}{NA}$$

Thus, the lateral resolution for images used in 3D-qDMI is approximated as 125 nm for DAPI fluorescence and 150 nm for Alexa 488 fluorophore (conjugated to anti-MeC antibody). For high-resolution microscopy using high NA objectives, however, the Rayleigh criterion may not always give meaningful results due to apodization of the amplitude of the marginal (outer) beam. If resolution can be defined as the minimum separation distance at which the two objects can be

sufficiently distinguished, resolution is directly related to the full width at half maximum (FWHM) in intensity PSF. The scalar approximation for FWHM is given as:

$$FWHM_{lateral} = \frac{0.51\lambda}{NA}$$

Using this equation, FWHM is approximated as 160 nm and 191 nm, respectively for DAPI and Alexa 488 fluorophore (conjugated to anti-MeC antibody). To calculate the axial resolution (in  $z$  direction), a variety of equations can be found in the microscopy literature. One equation commonly used to describe axial resolution is:

$$r_{axial} = \frac{1.4\lambda \cdot \eta}{NA^2}$$

where  $\eta$  is the refractive index of medium between the specimen and the objective lens. The confocal microscopy shown in this section uses 80% glycerol solution, which has  $\eta \sim 1.44$ . Using this equation, the axial resolution is approximated as 487 nm for DAPI fluorescence and 582 nm for Alexa 488 fluorophore (conjugated to anti-MeC antibody).

## **2. Determining ideal voxel cube size**

For topological voxel analysis, the nuclear ROI is partitioned into large number of voxel cubes, with equal size in  $x$ ,  $y$ ,  $z$  directions (Figure S4.1).



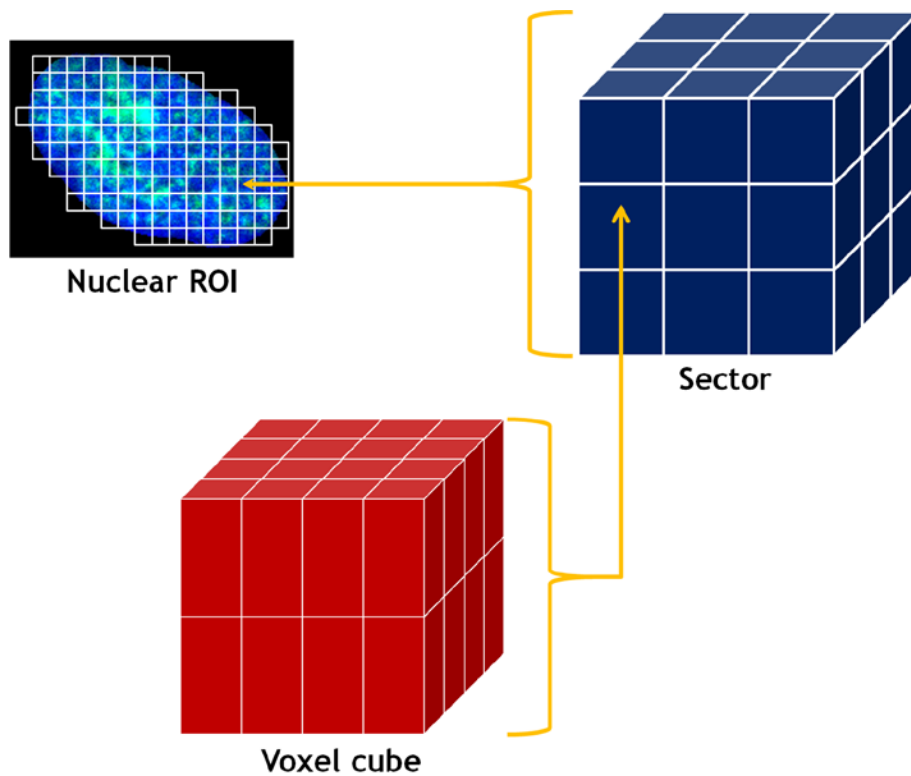

Figure S4.1: Division of nuclear ROI into sub-nuclear compartments. For topological analysis of sub-nuclear features, the ROI is divided into sectors, which are further divided into voxel cubes. Each voxel cube consists of  $4(x) \times 4(y) \times 2(z)$  pixels, which comprises a physical cube with a side of 500 nm, and each sector is composed of  $3(x) \times 3(y) \times 3(z)$  voxel cubes.

To determine the size of these cubes, the inherent physical limitations of images need to be considered. As mentioned elsewhere, each pixel in the set of images analyzed for this research has the dimensions of 120 nm ( $x$ )  $\times$  120 nm ( $y$ )  $\times$  250 nm ( $z$ ). In previous section, the axial resolution of the confocal microscopy with the laser scanning confocal microscope (Leica Microsystems TCS SP5X Supercontinuum) and the objective (Leica HCX Plan-Apo 63x, NA=1.3) used for obtaining these images was determined to be around 500 nm. Thus, each voxel cube has the size of 500 nm. Because of the sampling differences in lateral ( $x, y$ ) and axial ( $z$ )

directions, the voxel cube unit was implemented by grouping 4 (x) x 4 (y) x 2 (z) contiguous pixels, 32 pixels in total (Figure S4.2).

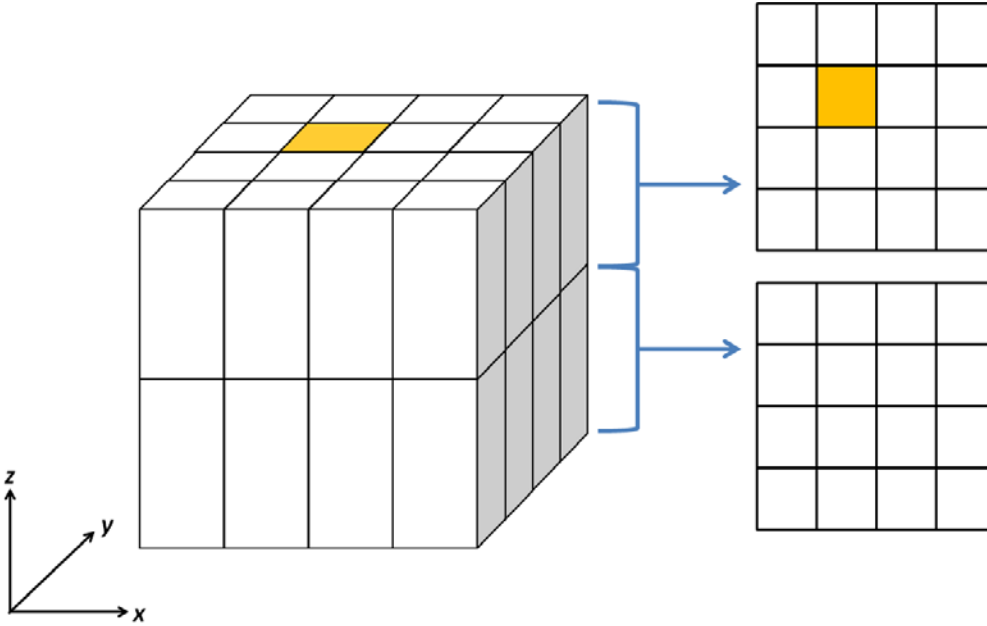

Figure S4.2: Graphical representation of a voxel cube. The voxel cube is defined as 4 (x) x 4 (y) x 2 (z) contiguous pixels, which represent the physical space of 500 nm x 500 nm x 500 nm. A voxel cube consists of maximum 32 pixels.

The actual implementation of splitting nuclear ROIs into voxel cubes occurs by “meshing.” For cubes at the edge of these images, in which 4 x 4 x 2 pixels could not be found, extra “blank” pixels were added appropriately so that the size of each voxel cube is uniform. A separate matrix  $V_{vox}$  is created to note the number of pixels in each voxel cube that is within the boundaries of nuclear ROI, as defined by the final segmentation map from image pre-processing step of 3D-qDMI.

### **Supplementary File 5**

Prior to any analysis, intensity values of all pixels in nuclear ROI are classified into 3 groups for DAPI channel and 2 groups for MeC channel, based on thresholds  $t_{DAPI,low}$ ,  $t_{DAPI,high}$ , and  $t_{MeC}$ .

The methods for determining these threshold values are shown in Additional File 6. From the thresholds, each pixel is defined as such:

$$I_{DAPI-class}(x, y, z) = \begin{cases} -1, & \text{if } I_{DAPI}(x, y, z) \leq t_{DAPI,low} \\ 0, & \text{if } t_{DAPI,low} < I_{DAPI}(x, y, z) < t_{DAPI,high} \\ 1, & \text{if } I_{DAPI}(x, y, z) \geq t_{DAPI,high} \end{cases}$$

$$I_{MeC-class}(x, y, z) = \begin{cases} 0, & \text{if } I_{MeC}(x, y, z) \leq t_{MeC} \\ 1, & \text{if } I_{MeC}(x, y, z) > t_{MeC} \end{cases}$$

Using these classifications, the level of condensation and methylation is calculated from its constituent pixels in the nuclear ROI. The method and parameters used are inspired by a previous publication delineating heterogeneity and condensation of stained chromatin in cell nuclei in two dimensions (Young et al., referenced in [76]) and has been adapted for use with 3-D image processing workflow. To analyze the degree of condensation and methylation and the genomic organization within each voxel cube, the following three parameters are determined: the the condensation level of DNA measured in DAPI channel (*cond*), the total degree of methylation (*meth*), and the associativity of DAPI and MeC channels (*assoc*).

**(a) Condensation level of genomic DNA:**

To define condensation, two other parameters clumping (*cl*) and charge (*ch*) must be first determined. Clumping (*cl*) measures the spatial localization of intensities and can be defined for either DAPI or MeC channels as:

$$cl_{DAPI} = \frac{\sum_j^{V_{vox}} II_{DAPI}(j)}{V_{vox}}, \quad cl_{MeC} = \frac{\sum_j^{V_{vox}} II_{MeC}(j)}{V_{vox}}$$

where  $j$  is a single pixel in the voxel,  $V_{vox}$  is the number of active pixels in the voxel, and  $I_{DAPI}$  and  $I_{MeC}$  are the integrated intensities in DAPI and MeC channels respectively. Integrated intensity is defined for each pixel in the voxel and is the weighted average of the pixels and its neighbors (Figure S5.1).

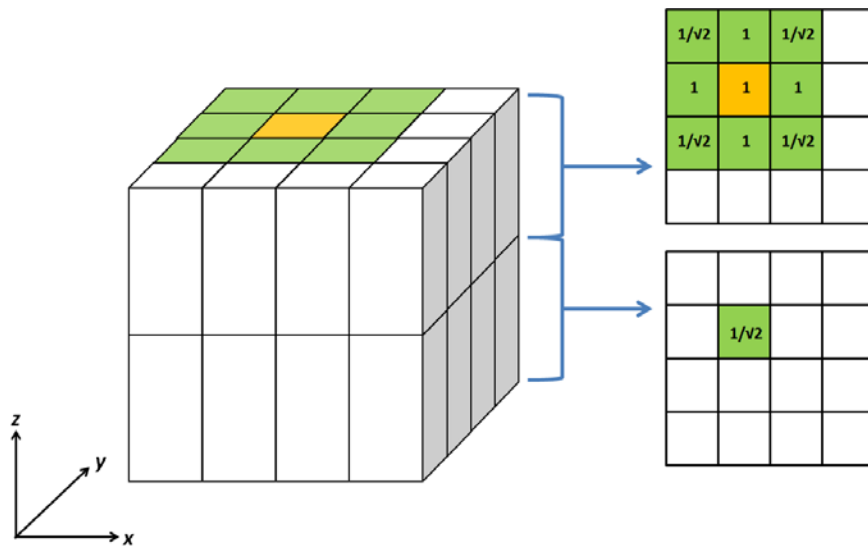

Figure S5.1: Weights used for determining clumping. In calculating clump of a single pixel (shown in gold) for either DAPI or MeC channel, the pixel itself, its 8 neighbors in the same z-plane and its immediate neighbor in the other  $\neg$ z-plane is considered. The weights used for each pixel other than itself is determined by the distance from the original pixel to the neighboring pixel.

The weights are set as the inverse of the distance of a pixel to its neighboring pixel. If a pixel does not have a neighbor (limited by the voxel dimensions) or its neighbor is outside the nuclear ROI, the weight for that neighbor is set to zero so that its influence can be neglected. The integrated intensity for pixels in DAPI and MeC channels ( $I_{DAPI}$  and  $I_{MeC}$  respectively) are defined as:

$$II_{DAPI} = \frac{\sum_i w_i \cdot \left( \frac{I_{DAPI-class}(i) + 1}{2} \right)}{\sum_i w_i}$$

$$II_{MeC} = \frac{\sum_i w_i \cdot (I_{MeC-class}(i))}{\sum_i w_i}$$

where  $w$  is the weight array. Clumping for either channel is restricted to  $0 \leq cl \leq 1$ . Clumping will give a high value if high-intensity pixels are located next to each other, as its name suggests. Charge ( $ch$ ) reflects the bias towards low- or high-intensity pixels in the DAPI channel and is defined as:

$$ch = \frac{N_{high} - N_{low}}{V_{vox}}$$

With the two prerequisite parameters defined, one can now determine the level of DNA condensation ( $cond$ ) as the normalized product of clumping and charge:

$$cond = k * \frac{\sqrt{|(cl_{DAPI} - 0.5)^2 * ch|}}{2} + 0.5$$

where  $k = 1$  if  $ch \geq 0$  and  $k = -1$  if  $ch < 0$ . Condensation is constrained  $0 \leq cond \leq 1$  and represents the condensation level of the DNA in the voxel. A high condensation level is achieved by large, localized concentration of high-intensity DAPI pixels.

**(b) Relative degree of methylation:**

The degree of methylation ( $meth$ ) is defined as:

$$meth = \sqrt{cl_{MeC} * comb}$$

where  $cl_{MeC}$  is the clumping in the MeC channel previously determined and  $comb$  is the combined total weight of the two channels, defined as:

$$comb = \frac{\sum_j^{V_{vox}} \frac{(I_{DAPI-class}(j) + 2) * I_{MeC-class}(j)}{3}}{V_{vox}}$$

where  $j$  is a single pixel in the voxel and  $V_{vox}$  is the number of active pixels in the voxel. The combined weight is calculated with the assumption that high-intensity pixels in DAPI channels contain more DNA than low-intensity pixels and, thus, more sites are available to be methylated.  $comb$  is normalized to a value between 0 and 1. By defining  $meth$  as the geometric mean of  $cl_{MeC}$  and  $comb$ , both the spatial concentration of MeC pixels and the weighted concentration of MeC sites are considered. The actual value of  $meth$  is constrained to  $0 \leq meth \leq 1$ .

**(c) Associativity of DAPI and MeC channels:**

Associativity ( $assoc$ ) determines the correlation of low- or high-intensity pixels in both channels and is defined as:

$$assoc = \frac{\sum_j^{V_{vox}} \left( 1 - \left( \frac{I_{DAPI-class}(j) + 1}{2} - I_{MeC-class}(j) \right)^2 \right)}{V_{vox}}$$

where  $j$  is a single pixel in the voxel and  $V_{vox}$  is the number of active pixels in the voxel. The value of  $assoc$  is constrained to  $0 \leq assoc \leq 1$ . The closer the two values ( $I_{DAPI-class}$  and  $I_{MeC-class}$ ) are, the higher the associativity of the voxel is. The three parameters defined above are fairly robust in their ability to distinguish different levels and types of DNA condensation and methylation. The parameters purposely combine intensity information found in both DAPI and MeC channels to derive a more accurate view of nuclear genomic organization and DNA

methylation patterns. Figure S5.2 gives a conceptual model of a voxel cube to show how these parameters would be calculated. These parameters can also highlight very extreme cases. Consider an example in which all 32 pixels in a voxel are represented by high-intensity signals in both DAPI and MeC channels. Then for this example,  $cond = 1$ ,  $meth = 1$ , and  $assoc = 1$ , suggesting that this voxel represents an area of very high DNA condensation, as in metaphase chromosomes, with very little variation. At the other extreme, consider a voxel that is entirely composed of low-intensity signals in both channels, representing essentially a “blank” area. In this case,  $cond = 0$ ,  $meth = 0$ , and  $assoc = 1$  (Figure S5.2).

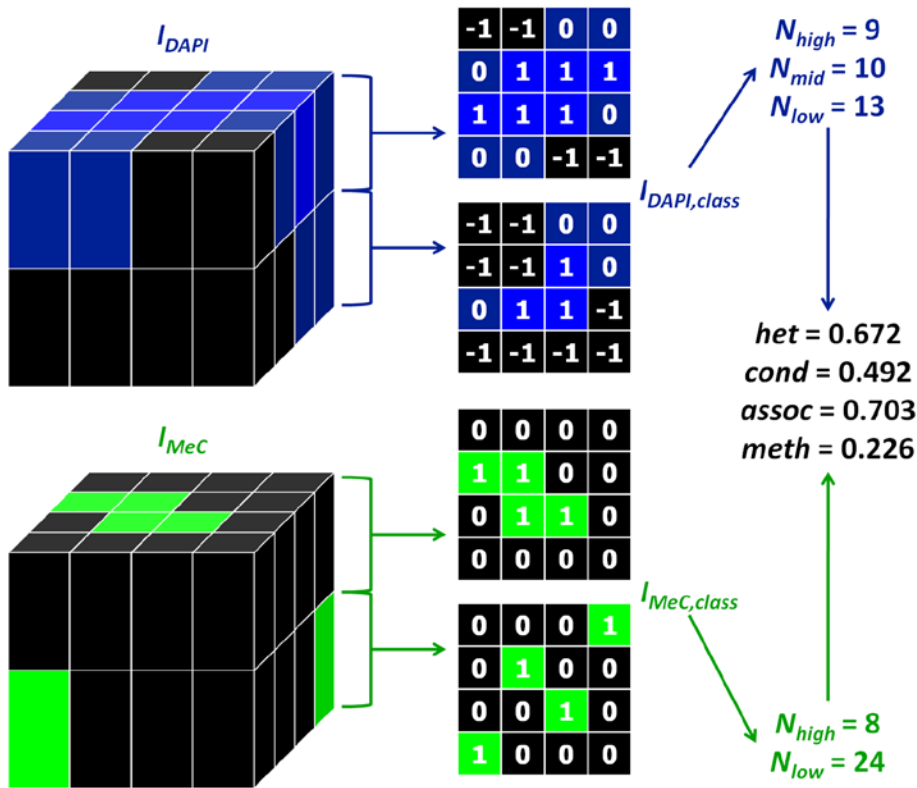

Figure S5.2: Conceptual example of voxel-level analysis of condensation and methylation. A conceptual example of a voxel is shown. From the parameters calculated, this voxel can be inferred as somewhat heterogeneous in DAPI intensity distribution with mid-level DNA

condensation. It is low in methylation, and the MeC sites are highly associated with pixels of high DAPI concentration.

### **Supplementary File 6**

One important criterion needed for topological distribution analysis is the correct classification of pixel intensities as being of low or high intensity. Although all images used for these analyses were acquired under nearly identical conditions and modality settings, even minute changes in these settings could lead to differences in pixel intensity for the same strand of DNA with identical methylation patterns. Thus, classification of pixels into low- and high-intensities should not rely simply on a fixed numerical threshold; instead, the threshold needs to be adjusted based on the inherent characteristics of the image, such as mean background intensity and maximum pixel intensity found in the image. Accurate classification is particularly important for the MeC channel, as low-intensity signals related to hypomethylation or demethylation can be affected by instrument settings (detection PMT voltages, etc.). This issue is less critical in the DAPI channel, since DAPI stains double strand DNA indiscriminately, by intercalating at A-T clusters in the minor groove of the double stranded helix, and, thus, only changes due to instrument settings need to be considered. Therefore, the threshold for each channel is set differently to address these different requirements.

The tripartite classification of pixels in the DAPI channel is performed by introducing two thresholds  $t_{DAPI, low}$  and  $t_{DAPI, high}$ . These thresholds are determined by:

$$t_{DAPI, low} = k_{D1} \cdot (\max(I_{DAPI}) - \mu_{DAPI, back})$$



$$t_{DAPI,high} = k_{D2} \cdot (\max(I_{DAPI}) - \mu_{DAPI,back})$$

where  $\mu_{DAPI,back}$  is the mean of the background (i.e., all pixels in  $I_{DAPI}$  outside nuclear ROIs) found separately during segmentation process,  $\max(I_{DAPI})$  is the maximum pixel intensity value found in the ROIs in  $I_{DAPI}$ , and  $k_{D1}$  and  $k_{D2}$  are coefficients determined independently of the specific image analyzed. The coefficients  $k_{D1}$  and  $k_{D2}$  were determined from  $I_{DAPI}$  to account for possible differences in the intensity values among various DAPI channel images, and was obtained prior to any analysis. A large number of randomly chosen images ( $\sim 500$ ) of various cell lines and passage numbers, chosen as a training set. All pixels with nuclear ROIs were then normalized by the mean of the background ( $\mu_{DAPI,back}$ ) and the maximum pixel intensity value found in that image as follows:

$$\overline{I_{DAPI}} = \frac{I_{DAPI} - \mu_{DAPI,back}}{\max(I_{DAPI}) - \mu_{DAPI,back}}$$

The values from all normalized images were then combined to form a 1-dimensional array, which was then sorted.  $k_{D1}$  is the 25<sup>th</sup> percentile value and  $k_{D2}$  is the 75<sup>th</sup> percentile value of this normalized array. The coefficients found for the purposes of this research were  $k_{D1} = 0.169$  and  $k_{D2} = 0.454$ .

From the two thresholds, a ternary image  $I_{DAPI-class}$  is defined as follows:

$$I_{DAPI-class}(x, y, z) = \begin{cases} -1, & \text{if } I_{DAPI}(x, y, z) \leq t_{DAPI,low} \\ 0, & \text{if } t_{DAPI,low} < I_{DAPI}(x, y, z) < t_{DAPI,high} \\ 1, & \text{if } I_{DAPI}(x, y, z) \geq t_{DAPI,high} \end{cases}$$

For the MeC channel, as  $I_{MeC}$  comes from an antibody staining, the classification procedure is designed to be similar to that of FACS (fluorescence-activated cell sorting):  $I_{MeC}$  is separated to regions of MeC<sup>high</sup> and MeC<sup>low</sup>. The threshold ( $t_{MeC}$ ) is determined as follows:

$$t_{MeC} = \max(k_M \cdot (\max(I_{MeC}) - \mu_{MeC,back}))$$

where  $\mu_{MeC,back}$  is the mean of the background (i.e., all pixels in  $I_{MeC}$  outside nuclear ROIs) found separately during segmentation process,  $\max(I_{MeC})$  is the maximum pixel intensity value found in the ROIs in  $I_{MeC}$ ,  $k_M$  is the coefficient determined independently of the specific image analyzed. The method for finding the coefficient  $k_M$  is different from the method used for finding  $k_{D1}$  and  $k_{D2}$ , since a simple normalization technique yields less than desirable results. As previously mentioned, there is a need to distinguish whether low-intensity signals are caused by instrument settings leading to a generally darker image or the actual absence of MeC in that spatial region. As before, a large number of randomly chosen images ( $\sim 100$ ) of various cell lines and passage numbers were chosen as a training set; however, unlike the method for determining analogous coefficients for  $I_{DAPI}$ , masks for nuclear ROIs were not used. Instead, all pixels in  $I_{MeC}$ , inside and outside ROIs, from these randomly chosen images were pooled together, without any normalization, to form a large one-dimensional array of pixel intensity values.

Cluster analysis was performed by k-means clustering to separate the array into three clusters. The means of the three clusters will be referred to as  $\mu_1$ ,  $\mu_2$ , and  $\mu_3$ . Ideally, the first cluster should represent all pixels from the background, the second cluster should represent low-

intensity pixels, and the third cluster should represent high-intensity pixels. So,  $k_M$  is defined as follows:

$$k_M = \frac{\mu_2 - \mu_1}{\text{mean}(\max(I_{MeC})) - \mu_1}$$

where  $\text{mean}(\max(I_{MeC}))$  is the mean of maximum pixel intensity values found in each  $I_{MeC}$  of all images used as a training set. By taking the normalized value of  $\mu_2$ , instead of  $\mu_2$  directly, variations due to instrument settings are minimized, as the final threshold  $t_{MeC}$  is calculated with characteristics specific to that image. The coefficient  $k_M$  found for the purposes of this research was  $k_M = 0.176$ . From threshold  $t_{MeC}$ , a binary image of low-intensity MeC signals  $I_{LIM}$  is defined as follows:

$$I_{LIM}(x, y, z) = \begin{cases} 0, & \text{if } I_{DAPI}(x, y, z) > t_{MeC} \\ 1, & \text{if } I_{DAPI}(x, y, z) \leq t_{MeC} \end{cases}$$
